## RESEARCH ARTICLE

# A comparison of prokaryote communities inhabiting sponges, bacterial mats, sediment and seawater in Southeast Asian coral reefs

DFR Cleary<sup>1,\*†</sup>, ARM Polónia<sup>1</sup>, YM Huang<sup>2,3</sup>, S Putchakarn<sup>4</sup>, NCM Gomes<sup>1</sup> and NJ de Voogd<sup>5,6</sup>

<sup>1</sup>Department of Biology & CESAM, University of Aveiro, Campus de Santiago, 3810-193 Aveiro, Portugal, <sup>2</sup>Tropical Island Sustainable Development Research Center, National Penghu University of Science and Technology, 300 Liu-Ho Road, Magong City, Penghu 880, Taiwan, <sup>3</sup>Department of Marine Recreation, National Penghu University of Science and Technology, 300 Liu-Ho Road, Magong City, Penghu 880, Taiwan, <sup>4</sup>Institute of Marine Science, Burapha University, Chon Buri, 20131, Thailand, <sup>5</sup>Naturalis Biodiversity Center, Marine Biodiversity, Darwinweg 2, 2333 CR, Leiden, The Netherlands and <sup>6</sup>Institute of Environmental Sciences (CML), Environmental Biology Department, Leiden University, 2333 CC, The Netherlands

\*Corresponding author: CESAM and Department of Biology Universidade de Aveiro Campus Universitário de Santiago, 3810-193 Aveiro, Portugal. Tel: +351 234 370990; Fax: +351 234 370004; E-mail: [cleary@ua.pt](mailto:cleary@ua.pt) or [dfrcleary@gmail.com](mailto:dfrcleary@gmail.com)

**One sentence summary:** Prokaryote communities were sampled from 17 sponge species, bacterial mats, sediment and seawater in Southeast Asian coral reef habitats in order to assign HMA or LMA status and compare compositional variation among species.

Editor: Julie Olson

<sup>†</sup>DFR Cleary, <http://orcid.org/0000-0002-6143-3390>

## ABSTRACT

In the present study, we used Illumina sequencing to explore the prokaryote communities of 17 demosponge species and how they compare with bacterial mat, sediment and seawater samples (all sampled from coral reef habitat in Taiwan and Thailand). The studied sponge species formed three clusters. Operational taxonomic unit (OTU) richness and evenness were by far highest in the sediment and bacterial mat biotopes. There were pronounced differences in OTU richness and evenness among clusters and also considerable variation among certain host species within clusters. Additionally, the relative abundance of some prokaryotic taxa also differed among clusters with Poribacteria, e.g., being recorded in all sponge species, but with very low relative abundances in species of two of the three clusters. This sponge-associated phylum was, however, recorded at relatively high mean abundance in bacterial mat samples, which also housed relatively high abundances of actinobacterial and Chloroflexi members. Our results support high microbial abundance (HMA) status of the species *Aaptos lobata*, *Hyrtilis erectus*, *Pseudoceratina purpurea* and *Xestospongia testudinaria* and low microbial abundance (LMA) status of the species *Acanthella cavernosa*, *Echinodictyum asperum*, *Jaspis splendens*, *Ptilocaulis spiculifer*, *Stylissa carteri* and *Suberites diversicolor*. Other species (*Agelas cavernosa*, *Agelas nemoechinata*, *Acanthostylotella cornuta*, *Paratetilla* sp., *Hymeniacidon* sp. and *Haliclona cymaeformis*) deviated somewhat from the typical HMA/LMA dichotomy and formed a strongly supported cluster.

Received: 17 April 2019; Accepted: 20 October 2019

© FEMS 2019. All rights reserved. For permissions, please e-mail: [journals.permissions@oup.com](mailto:journals.permissions@oup.com)

**Keywords:** Agelasida; composition; coral reefs, Illumina; Penghu islands

## INTRODUCTION

Benthic sessile communities have undergone massive compositional shifts in recent decades under the influence of a range of perturbations including climate change, pollution, overfishing, coral mining and coastal development (Gardner et al. 2003; Hughes et al. 2003; Cleary et al. 2014, 2016; Polónia et al. 2015a; de Bakker et al. 2017; Cleary 2017). Various studies have reported an increase in sponge density (Bell et al. 2013; Loh et al. 2015; McMurray, Finelli and Pawlik 2015). Importantly, sponge microbial communities play critical roles in sponge growth and metabolism, production of secondary metabolites, modification of water column chemistry and adaptation to changing environmental conditions (Wulff 2001; Hentschel, Usher and Taylor 2006; Taylor et al. 2007; Bell 2008; Fan et al. 2012; Hentschel et al. 2012; Maldonado et al. 2016).

Sponges have long been classified according to their symbiont abundance and diversity as bacterial sponges versus non-symbiont sponges or high microbial abundance (HMA) versus low microbial abundance (LMA) sponges (Vacelet and Donadey 1977; Reiswig 1981; Hentschel et al. 2002, 2003). HMA sponges generally contain abundant and diverse microbial communities, while LMA sponges generally contain low abundance and low diversity microbial communities. In addition to microbial abundance and diversity, these groups also differ in terms of mesohyl density (denser in HMA), aquiferous canals (wider in LMA), choanocyte chambers (larger in LMA), pumping rates (higher in LMA) and the presence of some polyketide synthase genes (only found in HMA) (Vacelet and Donadey 1977; Hochmuth et al. 2010). LMA and HMA sponges also house compositionally distinct microbial communities (Bayer, Kamke and Hentschel 2014; Cleary et al. 2015, 2018; de Voogd et al. 2015, 2018; Polónia et al. 2015b; Moitinho-Silva et al. 2017). Bayer, Kamke and Hentschel (2014) and Moitinho-Silva et al. (2017) noted that certain phyla were much more prevalent in HMA as opposed to LMA sponges (e.g. Chloroflexi, Poribacteria and Actinobacteria) and suggested that they were 'HMA indicators'. In addition to previously reported HMA (Chloroflexi, Poribacteria and Actinobacteria) indicators, they also identified additional indicators including Acidobacteria, PAUC34f, Gemmatimonadetes, SAR202, Anaerolineae and Acidimicrobia. LMA sponges, in turn, were characterised by greater abundances of Bacteroidetes, Planctomycetes, Firmicutes, Alphaproteobacteria, Betaproteobacteria and Flavobacteriia. Although HMA or LMA status was initially based on transmission electron microscopy, this has not always proved effective at classifying sponge species to LMA or HMA status. For example, Gloeckner et al. (2014) remarked on the variable density of bacteria in HMA sponges with species belonging to the order Verongida housing densely packed bacterial communities in their mesohyl tissue, while species of the presumed HMA genera *Ircinia* and *Agelas* only housed moderately dense microbial consortia. In addition to electron microscopy, 16S rRNA gene sequencing has been shown to be a very useful technique in determining HMA or LMA status of the host sponge (Gloeckner et al. 2014).

In the present study, we used 16S rRNA gene sequencing to explore and compare the prokaryote communities of 17 sponge species, sediment, seawater and bacterial mat samples collected from sites in Taiwan and Thailand and to make preliminary assignments of HMA or LMA status for sponge species based on compositional data. The 17 sponge species were: *Aaptos*

*lobata*, *Acanthella cavernosa*, *Acanthostylotella cornuta*, *Agelas cavernosa*, *Agelas nemoechinata*, *Echinodictyum asperum*, *Haliclona cymaeformis*, *Hymeniacion sp.*, *Hyrtios erectus*, *Jaspis splendens*, *Neopetrosia sp.*, *Paratetilla sp.*, *Pseudoceratina purpurea*, *Ptilocaulis spiculifer*, *Stylissa carteri*, *Suberites diversicolor* and *Xestospongia testudinaria*. Our main objectives were to (1) compare prokaryote communities of sponges with communities found in bacterial mats, seawater and sediment based on 16S rRNA gene sequencing data, (2) identify the most abundant operational taxonomic unit (OTU) and major higher prokaryote taxa found in sponge species, (3) determine the overlap of abundant OTUs among sponge species and between sponge species and environmental samples, (4) assess to what extent sponge species form strongly supported clusters based on compositional data and (5) extend the current knowledge of the HMA-LMA dichotomy among phylogenetically distant and closely related sponge species.

## MATERIALS AND METHODS

### Location

All sponge, bacterial mat, sediment and seawater samples were collected from various locations in Taiwan and Thailand. Supplementary Table 1 (Supporting Information) provides details on the sampling locations and dates, gps coordinates, diversity indices, and relative abundances of selected prokaryote taxa in each sample. All locations were coral reef habitat. A detailed description of the Taiwanese sampling sites can be found in Coelho et al. (2018) and Huang et al. (2016b).

### Sampling

In the present study, we sampled 17 shallow water sponge species, bacterial mats, sediment and seawater (Table 1) in coral reef habitat in the Penghu Islands, Taiwan, from 25<sup>th</sup> to 29<sup>th</sup> of July, 2014; and in sites close to Phuket, Pattaya and Koh Tao, Thailand from 8<sup>th</sup> to 21<sup>st</sup> of August 2014 (Fig. 1 and Supplementary Table 1, Supporting Information). Additional samples were collected from Penghu from 24<sup>th</sup> of July to the 6<sup>th</sup> of August, 2016. For the environmental samples, sediment and seawater were collected at all sites, while bacterial mats were only collected from a single site in Thailand (Table 1). The sponge species were identified by NJ de Voogd, using classical morphological techniques, as *Acanthella cavernosa* (Dendy, 1922) (order: Bubarida); *Echinodictyum asperum* (Ridley and Dendy, 1886), and *Ptilocaulis spiculifer* (Lamarck, 1814) (order: Axinellida); *Jaspis splendens* (de Laubenfels, 1954), and *Paratetilla sp.* (order: Tetractinellida); *Stylissa carteri* (Dendy, 1889) (order: Scopalinida); *Agelas cavernosa* (Thiele, 1903); *Agelas nemoechinata* (Hoshino, 1985), and *Acanthostylotella cornuta* (Topsent, 1897) (order: Agelasida), *Aaptos lobata* (Calcinai, Bastari, Bertolino and Pansini, 2017); *Hymeniacion sp.* and *Suberites diversicolor* (Becking and Lim, 2009) (order: Suberitida); *Haliclona cymaeformis* (Esper, 1806); *Xestospongia testudinaria* (Lamarck, 1815), and *Neopetrosia sp.* (order: Haplosclerida); *Hyrtios erectus* (Keller, 1889) (order: Dictyoceratida); and *Pseudoceratina purpurea* (Carter, 1880) (order: Verongida). Three species, namely, *S. carteri*, *H. erectus* and *X. testudinaria* were collected in multiple locations. A total of 2–10 replicates were sampled per biotope (Table 1). Subsequent statistical analyses were only performed using biotopes with at least three replicates. Sponges were photographed in situ, collected

**Table 1.** List of biotopes (bacterial mats, sediment, seawater and sponge species) sampled and number of samples collected from the main sampling locations in Koh Tao, Thailand, Pattaya, Thailand, Phuket, Thailand and the Penghu archipelago, Taiwan.

| Type          | Biotope                          | Koh Tao, Thailand | Pattaya, Thailand | Phuket, Thailand | Taiwan |
|---------------|----------------------------------|-------------------|-------------------|------------------|--------|
| Sponge        | <i>Aaptos lobata</i>             |                   |                   |                  | 2      |
| Sponge        | <i>Agelas cavernosa</i>          |                   |                   |                  | 3      |
| Sponge        | <i>Acanthella cavernosa</i>      |                   |                   | 3                |        |
| Sponge        | <i>Acanthostylotella cornuta</i> |                   |                   |                  | 2      |
| Sponge        | <i>Agelas nemoechinata</i>       |                   |                   |                  | 2      |
| Sponge        | <i>Echinodictyum asperum</i>     |                   |                   |                  | 3      |
| Sponge        | <i>Haliclona cymaeformis</i>     |                   |                   |                  | 4      |
| Sponge        | <i>Hymeniacion sp.</i>           |                   |                   |                  | 2      |
| Sponge        | <i>Hyrtios erectus</i>           | 3                 | 2                 | 3                |        |
| Sponge        | <i>Jaspis splendens</i>          |                   |                   |                  | 3      |
| Sponge        | <i>Neopetrosia sp.</i>           | 1                 | 3                 |                  |        |
| Sponge        | <i>Paratetilla sp.</i>           |                   |                   |                  | 2      |
| Sponge        | <i>Pseudoceratina purpurea</i>   | 2                 |                   |                  |        |
| Sponge        | <i>Ptilocaulis spiculifer</i>    |                   |                   |                  | 4      |
| Sponge        | <i>Stylissa carteri</i>          |                   |                   | 3                | 4      |
| Sponge        | <i>Suberites diversicolor</i>    |                   |                   |                  | 3      |
| Sponge        | <i>Xestospongia testudinaria</i> | 3                 | 1                 | 2                | 3      |
| Environmental | Bacterial mat                    | 3                 |                   |                  |        |
| Environmental | Sediment                         | 1                 | 3                 | 1                | 4      |
| Environmental | Seawater                         | 2                 | 2                 | 3                | 3      |

using scuba diving, brought back to the laboratory and preserved in 95% ethanol for further identification and molecular work. All specimens have been deposited at Naturalis Biodiversity Center, Leiden, the Netherlands. Sponges were sampled with an apple corer or cut with a dive knife in order to sample the surface and interior. In addition to sponges, we sampled sediment, seawater and bacterial mats. Sediment was sampled with a syringe, extracting the first 5 cm. Bacterial mats were scraped off the surface sediment, partially or in their entirety depending on the size. The seawater prokaryote community was sampled by first collecting 1 l of seawater at ~ 1 m depth and subsequently filtering this through a Millipore® White Isopore Membrane Filter (0.22 µm pore size).

### DNA extraction and sequencing

For prokaryotes, the 16S rRNA gene V3V4 variable region PCR primers 341F 5'-CCTACGGGNGGCWGCAG-3' and 785R 5'-GACTA CHVGGGTATCTAATCC-3' (Klindworth et al. 2013) with expected amplicon size of 444 bp and barcode on the forward primer were used in a 28 cycle PCR assay (5 cycle used on PCR products) using the HotStarTaq Plus Master Mix Kit (Qiagen, USA) under the following conditions: 94°C for 3 minutes, followed by 28 cycles of 94°C for 30 seconds, 53°C for 40 seconds and 72°C for 1 minute, after which a final elongation step at 72°C for 5 minutes was performed. A blank control, in which no tissue was added to the Lysing Matrix E tubes, was also included in the samples. After amplification, PCR products were checked in 2% agarose gel to determine the success of amplification and the relative intensity of bands. Multiple samples were pooled together in equal proportions based on their molecular weight and DNA concentrations. Pooled samples were purified using calibrated Ampure XP beads. Pooled and purified PCR product was used to prepare the DNA library following the Illumina TruSeq DNA library preparation protocol. Next-generation, paired-end sequencing was performed at mrDNA Molecular Research LP (<http://www.mrdnalab.com/>; last checked 18 November 2016) on an Illumina MiSeq device (Illumina Inc, San Diego, CA, USA) following the manufacturer's guidelines. Sequences from each end were

joined following Q25 quality trimming of the ends followed by reorienting any 3'-5' reads back into 5'-3', and removal of short reads (<150 bp). The resultant files were analysed using the QIIME (Quantitative Insights Into Microbial Ecology; Caporaso et al. 2010) software package (<http://www.qiime.org/>; last checked 20 January 2017).

### 16S sequencing analysis

In QIIME, fasta and qual files were used as input for the `split_libraries.py` script. Default arguments were used except for the minimum sequence length, which was set at 250 bps after removal of forward primers and barcodes. In addition to user-defined cut-offs, the `split_libraries.py` script performs several quality filtering steps ([http://qiime.org/scripts/split\\_libraries.html](http://qiime.org/scripts/split_libraries.html)). OTUs (97% similarity cut-off) were selected using UPARSE with `usearch10` (Edgar 2013). The UPARSE sequence analysis tool (Edgar 2013) provides clustering, chimera checking and quality filtering on de-multiplexed sequences. Chimera checking was performed using the UCHIME algorithm (Edgar et al. 2011). Reads were filtered with the `-fastq_filter` command and the following arguments `-fastq_truncflen 250 -fastq_maxee 0.5 -fastq_truncqual 15`. Sequences were then dereplicated and sorted using the `-derep_fulllength` and `-sortbysize` commands. OTU clustering was performed using the `-cluster_otus` command. In QIIME, representative sequences were selected using the `pick_rep_set.py` script using the 'most\_abundant' method. Potential contaminants were removed from the OTU table if they occurred at least two times in the blank control. This conservative measure was chosen because of observations of bleeding between samples from Illumina sequencing and the appearance of abundant reads in blank controls with very low counts (Mitra et al. 2015; Sinha 2017). OTUs not classified as Bacteria or Archaea or classified as chloroplasts or mitochondria were also removed. Taxonomy was assigned to reference sequences of OTUs using default arguments in the `assign_taxonomy.py` script in QIIME using the SILVA\_128\_QIIME\_release database and the `uclust` classifier method (Quast et al. 2013).

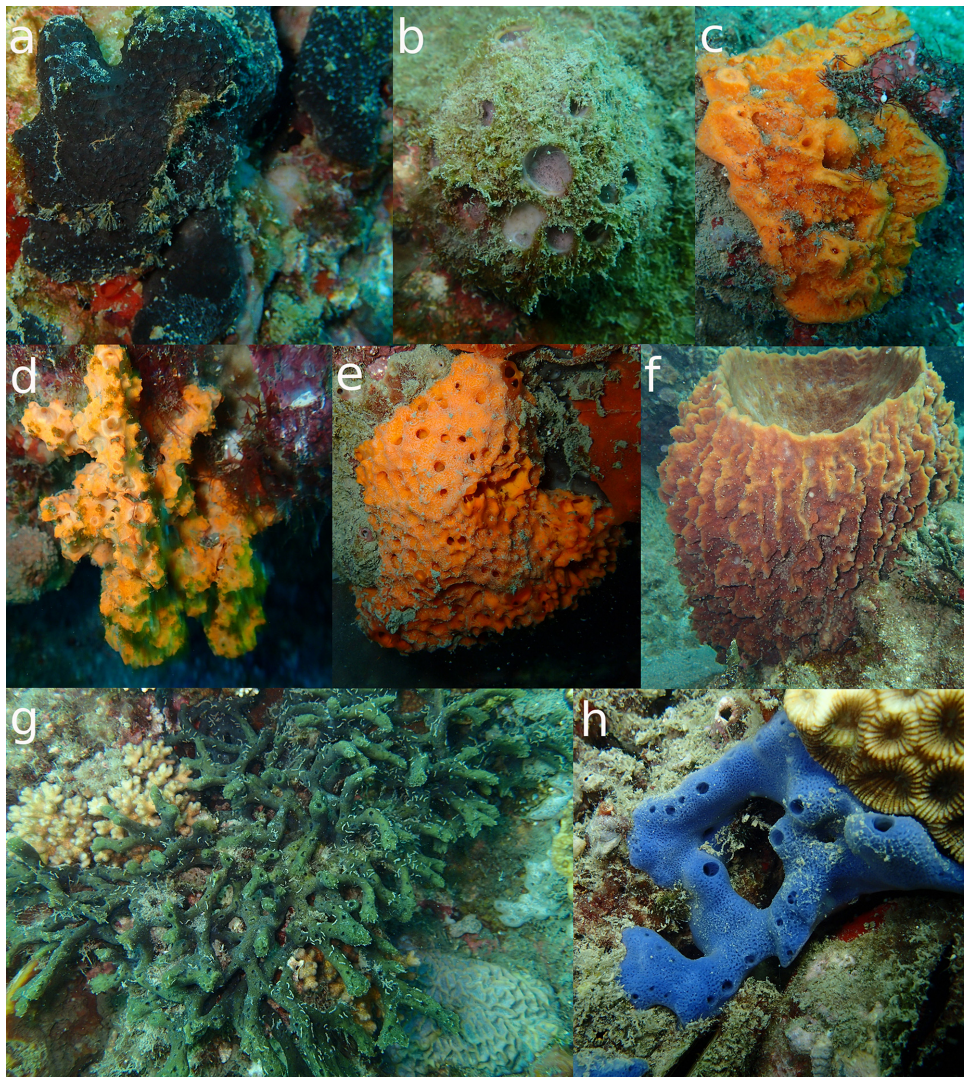

**Figure 1.** Underwater photographs of selected species sampled in the present study: (A) *H. erectus*, (B) *Paratettilla* sp., (C) *J. splendens*, (D) *S. carteri*, (E) *A. cavernosa*, (F) *X. testudinaria*, (G) *H. cymaeformis* and (H) *Neopetrosia* sp.c

We used the `make_otu_table.py` script in QIIME to generate a square matrix of OTUs x SAMPLES and rarefied this to 10 000 sequences per sample with the `single_rarefaction.py` script in QIIME. This rarefied table was subsequently used as input for further analyses using the R package (R Core Team 2013). Sequence Identifiers of closely related taxa of the most abundant OTUs were downloaded using the NCBI Basic Local Alignment Search Tool (BLAST) command line 'blastn' tool with the `-db` argument set to nt (Zhang *et al.* 2000). BLAST identifies locally similar regions between sequences, compares sequences to extant databases and assesses the significance of matches; evolutionary relationships can subsequently be inferred. Each run produces a list of hits based on significant similarity between pairs of sequences, i.e., the target sequence and taxa present in the database (or no hits if no significantly similar sequences are found). A discussion of how significance is determined can be found at <http://www.ncbi.nlm.nih.gov/BLAST/tutorial/Altschul-1.html>. The sequences generated in this study can be downloaded from the NCBI SRA: SRP109605, SRP133416, SRP133417 and SRP133418.

### Statistical analysis

A table containing the OTU counts per sample was imported into R using the `read.csv()` function. This table was used to compare community composition, estimate richness and assess the relative abundance of the most abundant higher taxa (based on total number of sequences per taxon).

For compositional analyses, the OTU table was transformed using the `decostand()` function in `vegan` (Oksanen *et al.* 2019) with the `method` argument set to 'Hellinger'. With this transformation, the OTU table is adjusted such that subsequent analyses preserve the chosen distance among objects (samples in this case). The OTU table was transformed because of the inherent problems with the Euclidean-based distance metric, which is frequently used in cluster analyses (Legendre and Gallagher 2001). The Hellinger (Rao 1995) distance was chosen because it gave very good results in comparison to various distance metrics. In particular, it gave low weights to rare species, was monotonically related to the geographic distance along a model gradient, and reached an asymptote for sites with no species in common. It also produced little 'horseshoe effect' or inward

folding of sites at opposite ends of the gradient, in ordinations (Legendre and Gallagher 2001). A distance matrix was subsequently created with the `vegdist()` function in `vegan` using the Hellinger-transformed OTU table as input and the method argument set to 'euclidean'.

Variation in OTU composition was assessed with Principal Coordinates Analysis (PCO) using the `cmdscale()` function in R with the Hellinger-transformed distance matrix as input. Ordinations were produced for all samples (including sponge species, sediment, seawater and bacterial mats) and only including sponge species. Variation in OTU composition among sponge species was tested for significance using the `adonis()` function in `vegan`. In the `adonis` analysis, the Hellinger-transformed OTU table was the response variable with sponge species as independent variable. The number of permutations was set at 999; all other arguments used the default values set in the function. Weighted averages scores were computed for OTUs on the first two PCO axes using the `wascor()` function in the `vegan` package. We used the `simper()` function in `vegan` to identify significantly discriminating OTUs between pairs of biotopes based on the  $\log_e(x + 1)$  transformed OTU table and 999 permutations. Discriminating OTUs contribute most to differences in composition between biotopes.

In addition to PCO, we used unconstrained, hierarchical clustering to identify strongly supported clusters with the `pvclust` package (Suzuki and Shimodaira 2015). The `pvclust` package provides validation procedures to test the uncertainty of a classification (Borcard, Gillet and Legendre 2018), namely, calculating the bootstrap probability (BP) and the approximately unbiased *P* values (AU) based on multiscale bootstrap resampling. High AU values indicate that a given cluster is strongly (e.g.  $AU \geq 90$ ) or significantly ( $AU \geq 95$ ) supported by the data. In `pvclust`, a hierarchical clustering dendrogram was produced using the `pvclust()` function with the `method.dist` argument set to 'euclidean' and the `method.hclust` set to 'ward.D2' (Ward 1963). Input for the function consisted of the Hellinger-transformed OTU table. Ward's method (Ward 1963) minimises within-group sum of squares. With the above procedure, we were interested in assessing to what extent sponge species formed strongly supported clusters and if there was evidence for clustering at a higher level, e.g., HMA versus LMA species.

We tested for significant differences in the relative abundance of selected prokaryote higher taxa, OTU richness, evenness and the relative abundance of seawater (OTUs found in seawater, but not sediment) and environmental (OTUs found in seawater and/or sediment) OTUs among sponge species with an analysis of deviance using the `glm()` function in R. In order to study the distribution of seawater and environmental OTUs among sponge species, we created a subset of the total dataset only including OTUs with >100 sequences due to the high abundance of rare OTUs, which were only found in a single sample. A number of these variables included an excess of zero counts in the samples, therefore, we set the family argument to 'tweedie' (Tweedie 1984) with `var.power = 1.5` and `link.power = 0` (a compound Poisson–Gamma distribution). Using the `glm` model, we tested for significant variation among biotopes using the `anova()` function in R with the *F* test. We used the `emmeans()` function in the `emmeans` library (Lenth 2017) to perform multiple comparisons of mean abundance among biotopes using the false discovery rate (*fdr*) method in the `adjust` argument. A heatmap was constructed to visualise the distribution of the most abundant OTUs ( $\geq 3000$  sequences) using the `heatmap2()` function in the R package `gplots` (<http://www.cran.r-project.org/>). Detailed descriptions of the functions used here can be found in R (e.g.

?`cmdscale`) and online in reference manuals (<http://cran.r-project.org/web/packages/vegan/index.html>; Accessed 26 September 2011).

## RESULTS

Sequencing yielded 850 000 (after rarefaction to 10 000 sequences per sample) sequences binned into 19 329 OTUs after quality control and excluding OTUs assigned to chloroplasts and mitochondria. The number of phyla varied from 26 in *A. nemoechinata* to 66 in sediment. Among sponges, most phyla (42) were recorded in *Neopetrosia* sp. The number of classes varied from 49 in *A. lobata* to 154 in sediment. Among sponges, most classes were found in *S. carteri* at 89.

Proteobacteria were the most abundant phylum overall with 435 231 sequences and 8726 OTUs followed by Chloroflexi (84 247 sequences; 670 OTUs), Cyanobacteria (6 183 761 418 sequences; 272 OTUs), Actinobacteria (61 087 sequences; 401 OTUs) and Bacteroidetes (39 993 sequences; 2174 OTUs). Planctomycetes and Acidobacteria, with 2164 and 894 OTUs respectively, were among the most diverse phyla, but were less abundant in terms of sequences at 16 509 and 34 919 respectively. Supplementary Table 2 (Supporting Information) provides information on the number of sequences and OTUs recorded for all phyla and the major proteobacterial classes.

There was a highly significant difference in composition among sponge species (`adonis`:  $F_{16,46} = 12.72$ ;  $P < 0.001$ ;  $R^2 = 0.816$ ; Fig. 2a and b). Host species identity thus explained more than 80% of the variation in composition. The first axis separated samples of the sponge species *A. lobata*, *H. erectus*, *P. purpurea* and *X. testudinaria* (cluster 1) from samples of the sponge species *Acanthella cavernosa*, *E. asperum*, *J. splendens*, *Neopetrosia* sp., *P. spiculifer*, *S. carteri* and *S. diversicolor* (cluster 2) with samples of *Agelas cavernosa*, *A. nemoechinata*, *A. cornuta*, *H. cymaeformis*, *Hymeniacion* sp. and *Paratetilla* sp. (cluster 3) intermediate. The second axis separated samples of *H. cymaeformis*, *Hymeniacion* sp. and *Paratetilla* sp. from remaining sponge species. In Fig. 2c and d, which included bacterial mat, sediment and seawater samples, it can be seen that samples from the cluster 3 species *H. cymaeformis* and *Hymeniacion* sp. clustered closer to sediment samples while samples from cluster 2 species clustered closer to seawater samples. The three bacterial mat samples varied widely along the first axis of variation and were intermediate between sediment and sponge samples along axis-2.

The clusters mentioned above are also evident in a hierarchical clustering analysis. The major division in the analysis separated cluster 1 samples from cluster 2 and 3 samples. There was also strong support for cluster 2 samples ( $AU = 90$ ) and cluster 3 samples ( $AU = 94$ ). Within cluster 3, there was also strong support for a *H. cymaeformis*, *Hymeniacion* sp. and *Paratetilla* sp. cluster ( $AU = 91$ ) and a separate *Agelas cavernosa*, *A. nemoechinata*, *A. cornuta* cluster ( $AU = 93$ ). The strongest support, however, was at the host species level. In cluster 1, AU values were 97 for *X. testudinaria* and 100 for *A. lobata* and *P. purpurea* samples. *Hyrtilis erectus* formed two strongly supported clusters ( $AU \geq 97$ ). There was also significant structuring among geographical populations of *X. testudinaria* and *H. erectus* (Fig 3). For example, for *H. erectus*, samples from the geographically proximate (in terms of sea distance) locations of Pattaya and Koh Tao formed a strongly supported cluster ( $AU = 99$ ), which was distinct from samples from the more distant Phuket ( $AU = 97$ ). In cluster 2 and 3, the species *S. diversicolor*, *J. splendens*, *P. spiculifer*, *E. asperum*, *Agelas cavernosa*, *A. nemoechinata*, *A. cornuta*, *H. cymaeformis*, *Hymeniacion* sp. and *Paratetilla* sp. all formed strongly supported ( $AU >$

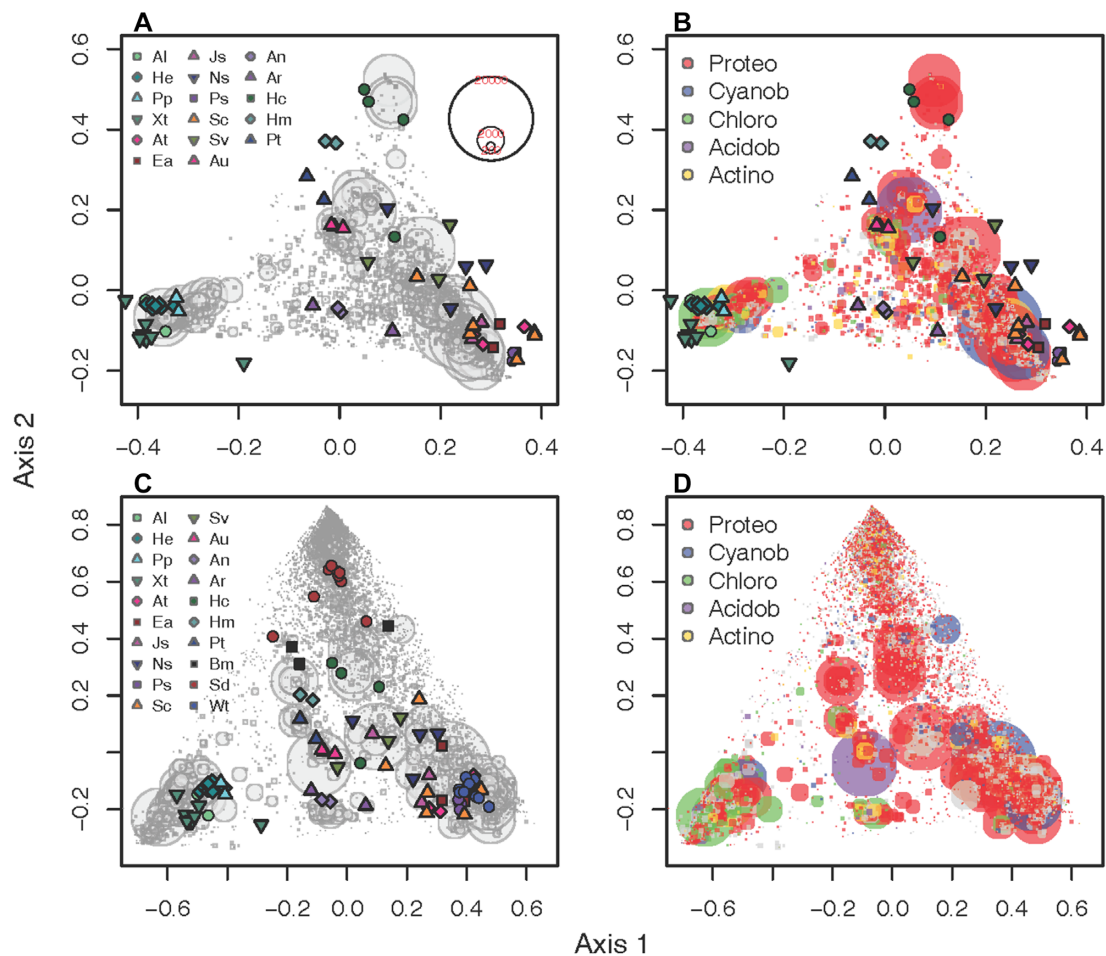

**Figure 2.** Ordination showing the first two axes of the principal coordinates analysis (PCO) of prokaryote OTU composition for sponge species. The eigenvalues for the axes are 7.96 (variance explained = 23.3%) and 3.34 (variance explained = 9.8%), respectively. In figure 2a, light grey symbols represent operational taxonomic unit (OTU) scores with the symbol size representing their abundance (number of sequence reads). In figure 2b the color of the symbol indicates their taxonomic affiliation: Proteo: Proteobacteria, Cyanob: Cyanobacteria, Chloro: Chloroflexi, Acido: Acidobacteria and Actino: Actinobacteria. Figures 2c and 2d show the ordination for the first two axes of the PCO for sponge species, bacterial mats, sediment and seawater. Codes refer to *A. lobata* (Al), *H. erectus* (He), *P. purpurea* (Pp), *X. testudinaria* (Xt), *A. cavernosa* (Au), *A. nemoechinata* (An), *A. cornuta* (Ar), *A. cavernosa* (At), *E. asperum* (Ea), *J. splendens* (Js), *Neopetrosia* sp. (Ns), *P. spiculifer* (Ps), *S. carteri* (Sc), *H. cymaeformis* (Hc), *Hymeniacion* sp. (Hm), *Paratetilla* sp. (Pt), *S. diversicolor* (Sv), bacterial mat (Bm), sediment (Sd) and seawater (Wt).

99) sub-clusters. This was, however, not the case for the cluster 2 species *Acanthella cavernosa*, *S. carteri* or *Neopetrosia* sp. (Fig 3) suggesting pronounced variation in the prokaryote composition of these species.

The clusters seen in Fig. 3 are also evident in a heatmap of the most abundant OTUs ( $\geq 3000$  sequences; Fig. 4). Note that this heatmap is based on untransformed OTU counts and not Hellinger-transformed data. The two main clusters in Fig. 4 include the same samples as the main clusters in Fig. 3. The main difference is between clusters 2 and 3. In Fig. 4, *H. cymaeformis*, *Hymeniacion* sp. and *Paratetilla* sp. form a distinct cluster whereas the agelasids *Agelas cavernosa*, *A. nemoechinata* and *A. cornuta*, cluster together with cluster 2 species. Figs 4 and 5 highlight OTUs that are particularly abundant in a given sponge species or sets of species. These include sets of significantly ( $P < 0.001$ ) discriminating OTUs identified using SIMPER analysis (Fig 5). Supplementary Table 3 (Supporting Information) provides the results of the SIMPER analysis including pairwise comparisons between pairs of biotopes.

In the SIMPER analysis, we only included biotopes with at least three samples. OTUs 44, 116, 122, 123, 132, 158, 168, 171, 187, 262 significantly discriminated *H. erectus* and *X.*

*testudinaria* from *Acanthella cavernosa*, *E. asperum*, *J. splendens*, *P. spiculifer*, *S. carteri*, *Neopetrosia* sp., *S. diversicolor* and *H. cymaeformis* (Fig. 5 and Supplementary Table 3, Supporting Information). None of these, however, discriminated *H. erectus* and *X. testudinaria* from bacterial mat samples. These OTUs were assigned to the Actinobacteria, SBR1093, Proteobacteria (Alpha-, Gamma- and Deltaproteobacteria) and Chloroflexi (TK10 and SAR202) and had high sequence similarities ( $>99\%$ ) to organisms obtained from the sponge species *Plakortis halichondrioides*, *Aplysina cauliformis*, *Rhopaloeides odorabile*, the coral *Porites lutea* and an endolithic community. Supplementary Table 4 (Supporting Information) provides a list of the most abundant OTUs and results from BLAST searches using representative sequences from these OTUs. Certain, but not all, of these OTUs were also relatively abundant in *A. nemoechinata* and *A. cornuta*, which were not tested due to the low number of replicates. A number of OTUs (25, 113, 138, 173, 185 and 1001) were relatively abundant in the species *Acanthella cavernosa*, *E. asperum*, *J. splendens*, *P. spiculifer*, *S. carteri*, *Neopetrosia* sp., but these were all shared with seawater and also present, albeit less abundant in other sponge species.

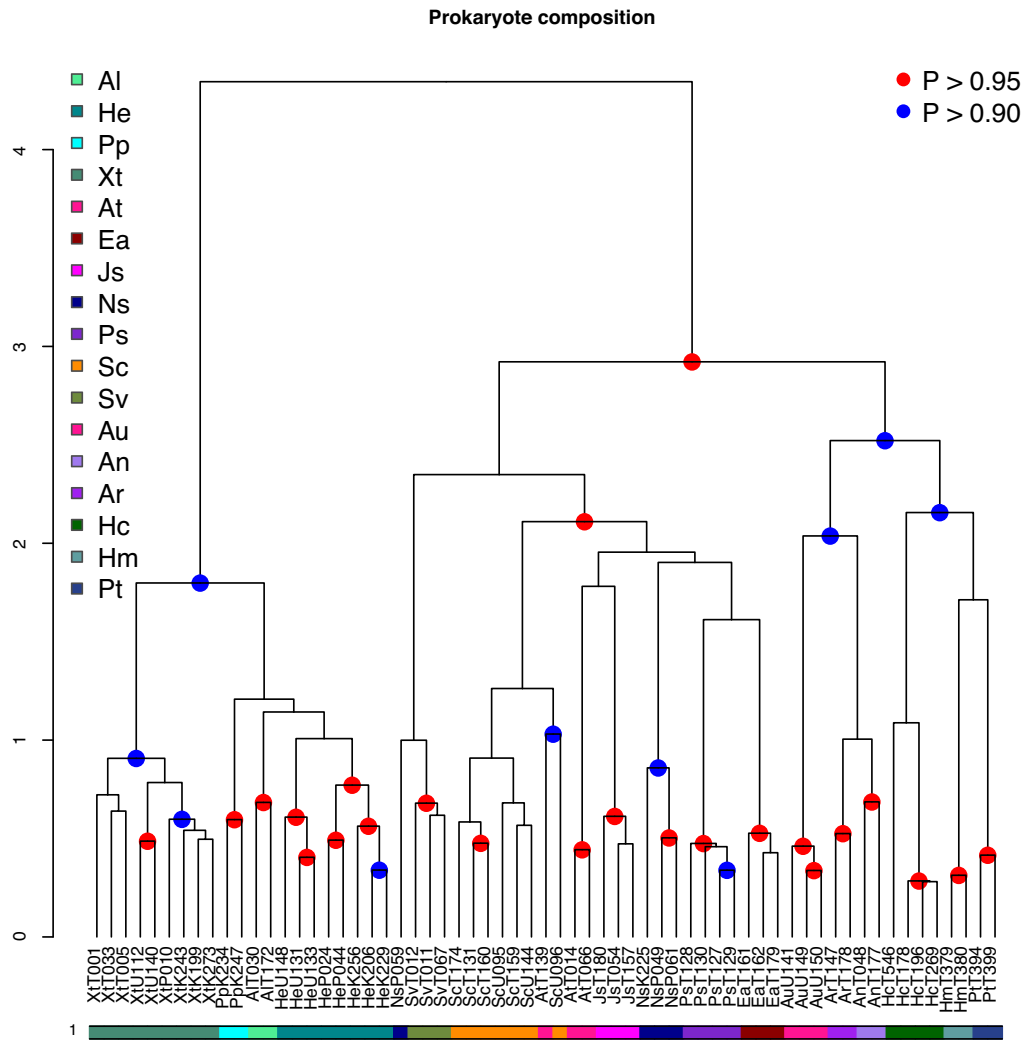

**Figure 3.** Unclassified, cluster dendrogram. Clusters with AU values > 90 are highlighted by blue symbols at the nodes while AU values > 95 are highlighted by red symbols at the nodes. The first two letters of the sample codes of the leaves refer to the sponge species: *A. lobata* (Al), *H. erectus* (He), *P. purpurea* (Pp), *X. testudinaria* (Xt), *A. cavernosa* (Au), *A. nemoechinata* (An), *A. cornuta* (Ar), *A. cavernosa* (At), *E. asperum* (Ea), *J. splendens* (Js), *Neopetrosia* sp. (Ns), *P. spiculifer* (Ps), *S. carteri* (Sc), *H. cymaeformis* (Hc), *Hymeniacion* sp. (Hm), *Paratetilla* sp. (Pt) and *S. diversicolor* (Sv). The bar at the bottom of the dendrogram is coloured according to the colours in the upper left legend. For more information about the samples, see Supplementary Table 1 (Supporting Information).

The sponge species *Acanthella cavernosa*, *E. asperum*, *J. splendens*, *P. spiculifer*, *S. carteri*, *Neopetrosia* sp., *S. diversicolor* and *H. cymaeformis* all contained small subsets of highly abundant, significantly discriminating OTUs. OTU-62, assigned to the Sva0996 marine group (Actinobacteria), significantly discriminated *A. cavernosa* from all tested biotopes. It had 94% sequence similarity to an organism obtained from the sponge *Pocillostra compressa*. OTU-41, assigned to the PAUC26f genus (Acidobacteria), significantly discriminated *Ag. cavernosa* from all other tested biotopes. Note that OTU-41 was also relatively abundant in the other agelasids *A. nemoechinata* and *A. cornuta*, but both of these sponge species only included two samples and were not tested.

OTU-109, assigned to the Nitrosomonadaceae (Betaproteobacteria), significantly discriminated *E. asperum* from all tested biotopes. It had 95% sequence similarity to an organism obtained from the sponge *Tsitsikamma favus*. OTUs 91, 130 and 167, assigned to the Tectomicrobia, JTB255 marine benthic group (Gammaproteobacteria) and Gammaproteobacteria, respectively, significantly discriminated *J. splendens* from all

tested biotopes. These OTUs had sequence similarities ranging from 93 to 97% with organisms obtained from sediment and a hypersaline basin. OTUs 45 and 64, assigned to the HTA4 (Gammaproteobacteria) and Nitrosomonadaceae, respectively, significantly discriminated *Neopetrosia* sp. from all tested biotopes. These OTUs had sequence similarities ranging from 98–99% to organisms obtained from the sponge species *Haliclona* sp. (Supplementary Table 4, Supporting Information).

OTUs 153 and 154, assigned to the Gammaproteobacteria and Nitrosomonadaceae, respectively, significantly discriminated *P. spiculifer* from all tested biotopes. These OTUs had sequence similarities ranging from 95–96% to organisms obtained from the sponge species *Raspailia topsenti* and *Haliclona* sp. OTUs 61, 96, 102 and 133, assigned to the HOC36 (Gammaproteobacteria), ARKDMS-49 (Proteobacteria), E01-9C-26 marine group (Gammaproteobacteria) and genus *Cenarchaeum* (Thaumarchaeota), significantly discriminated *S. carteri* from all tested biotopes. These OTUs had sequence similarities ranging from 98 to >99% with organisms obtained from the sponge species *Axinella* sp., *S. carteri* (from the Red

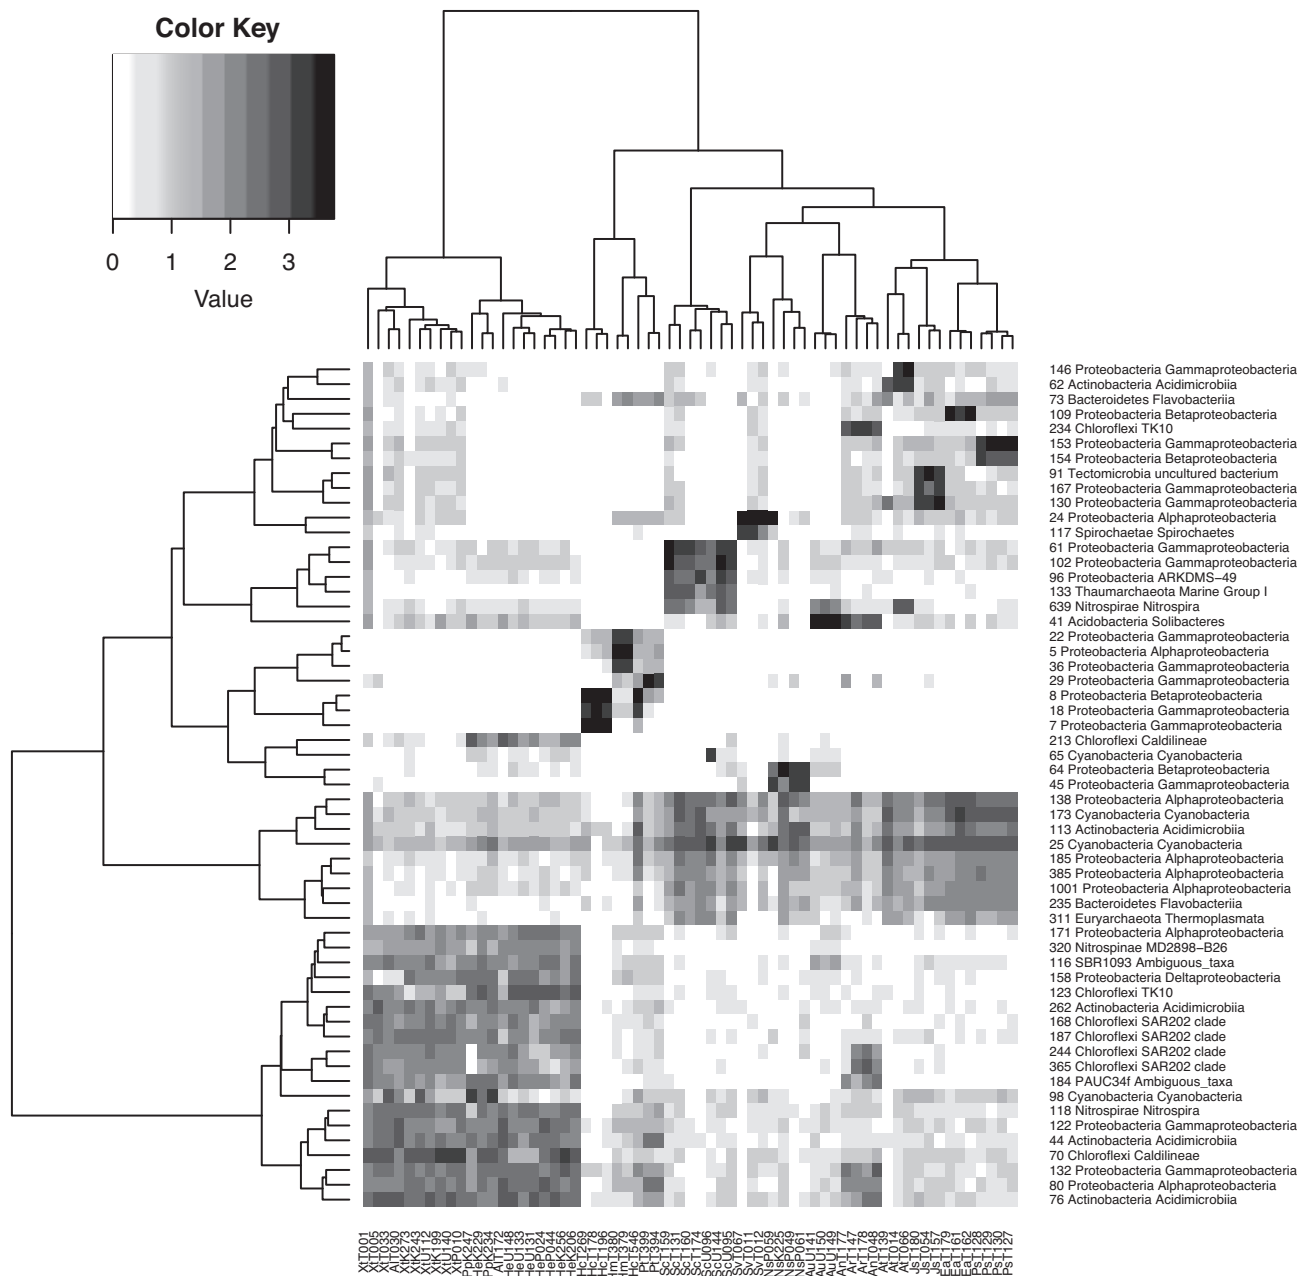

**Figure 4.** Heatmap of the most abundant OTUs found in *A. lobata* (Al), *H. erectus* (He), *P. purpurea* (Pp), *X. testudinaria* (Xt), *A. cavernosa* (Au), *A. nemochinata* (An), *A. cornuta* (Ar), *A. cavernosa* (At), *E. asperum* (Ea), *J. splendens* (Js), *Neopetrosia* sp. (Ns), *P. spiculifer* (Ps), *S. carteri* (Sc), *H. cymaeformis* (Hc), *Hymeniacidon* sp. (Hm), *Paratetilla* sp. (Pt) and *S. diversicolor* (Sv). The grey scale 'color key' represents abundance on a log<sub>10</sub> scale. The dendrograms for rows and columns were generated using the hclust function in R, which applies a hierarchical cluster analysis using the complete linkage method and based on a euclidean dissimilarity matrix of the most abundant OTUs and Ward's clustering function.

Sea), *Phakellia fusca* and *Xestospongia exigua*. OTUs 7, 8 and 18, assigned to the Gammaproteobacteria, Nitrosomonadaceae (Betaproteobacteria) and Oceanospirillales (Gammaproteobacteria), respectively, significantly discriminated *H. cymaeformis* from all tested biotopes. These OTUs had sequence similarities ranging from 98 to >99% with organisms obtained from the Caribbean sponge species *Callyspongia vaginalis* and Indo-West Pacific *Gelliodes carnosa*. OTUs 24 and 117, assigned to the Rhodospirillaceae (Alphaproteobacteria) and *Spirochaeta* 2 genus (Spirochaetales), respectively, significantly discriminated *S. diversicolor* from all tested biotopes. OTU-24 had 98% sequence

similarity to an organism obtained from marine sediment and OTU-117 had 94% sequence similarity to an organism obtained from the sponge species *Tsitsikamma favus* (Supplementary Table 4, Supporting Information).

In order to estimate the amount of environmental OTUs found in sponges, we created a dataset only including all OTUs >100 sequences (OTUs<sub>100</sub>). This subset included 677 OTUs<sub>100</sub> and 749 650 sequences (88.2% of all sequences). Of the 697 OTUs<sub>100</sub>, 588 (86.9%) representing 677 065 sequences (90.3%) were recorded in sediment samples, 481 (71.0%) representing 638 580 sequences (85.2%) in seawater samples and 625 (93.1%)



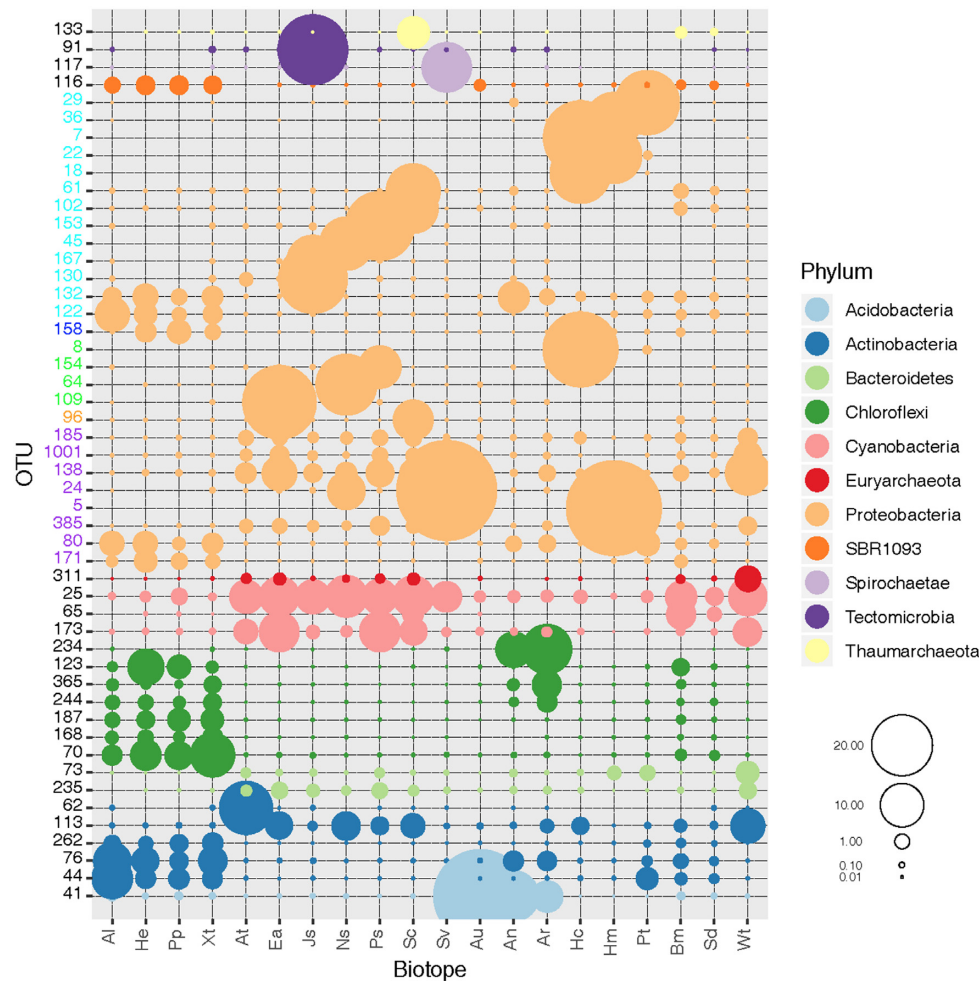

**Figure 5.** Relative abundance of significantly discriminating OTUs between pairs of biotopes identified using Simper ( $P < 0.001$ ) and colour-coded according to prokaryote phylum for *A. lobata* (Al), *H. erectus* (He), *P. purpurea* (Pp), *X. testudinaria* (Xt), *A. cavernosa* (Au), *A. nemoechinata* (An), *A. cornuta* (Ar), *Acanthella cavernosa* (At), *E. asperum* (Ea), *J. splendens* (Js), *Neopetrosia* sp. (Ns), *P. spiculifer* (Ps), *S. carteri* (Sc), *H. cymaeformis* (Hc), *Hymeniacion* sp. (Hm), *Paratetilla* sp. (Pt), *S. diversicolor* (Sv), bacterial mat (Bm) sediment (Sd) and seawater (Wt). The circle size of the OTU is proportional to the mean percentage of sequences per biotope as indicated by the symbol legend in the bottom right corner of the figure. The y-axis numbers shows the OTU number and have been colour coded for the proteobacterial OTUs in order to identify class assignment; purple: Alphaproteobacteria, orange: ARKDMS-49, green: Betaproteobacteria, blue: Deltaproteobacteria and cyan: Gammaproteobacteria.

representing 697 865 sequences (92.3%) in environmental samples (seawater and/or sediment). The relative abundance of seawater OTUs was significantly higher in the cluster 2 sponge species *Acanthella cavernosa*, *E. asperum*, *J. splendens*, *P. spiculifer* and *S. carteri* than all other tested biotopes (Fig. 6U). The relative abundance of seawater OTUs was also significantly higher in *H. erectus* than *X. testudinaria* (Supplementary Table 3, Supporting Information). The relative abundances of environmental (sediment and/or seawater) OTUs was significantly lower in the species *X. testudinaria* and *H. cymaeformis* than all other species (Fig. 6V). Supplementary Table 5 (Supporting Information) provides results of the emmeans analysis including pairwise comparisons between pairs of biotopes.

OTU richness was by far highest in the sediment and bacterial mat biotopes followed by the sponge species *E. asperum*, *J. splendens* and *P. spiculifer* and lowest in the species *A. lobata*, *Agelas cavernosa*, *A. nemoechinata* and *S. diversicolor* (Fig. 6 and Supplementary Table 5, Supporting Information). The sponge species *E. asperum* had significantly higher richness than all the tested cluster 1 and 3 species. Evenness was also

highest in the sediment and bacterial mat biotopes followed by the species *A. lobata*, *H. erectus* and *X. testudinaria* and lowest in the species *H. cymaeformis*, *Hymeniacion* sp., *J. splendens* and *S. diversicolor*. Evenness was significantly higher in the cluster 1 species *H. erectus* and *X. testudinaria* than all tested cluster 2 and 3 species.

There were also significant differences in the relative abundances of all of the most abundant phyla among biotopes (Fig. 6 and Supplementary Table 5, Supporting Information). The cluster 1 species *H. erectus* and *X. testudinaria* had significantly higher relative abundances of Chloroflexi, Acidobacteria (with the exception of *Agelas cavernosa*), Gemmatimonadetes, PAUC34f, SBR1093 and Poribacteria than all other biotopes. Note, however, that the untested agelasids *A. nemoechinata* and *A. cornuta* also had relatively high abundances of Chloroflexi, Acidobacteria, Gemmatimonadetes, PAUC34f and SBR1093, but not Poribacteria.

Overall, cluster 2 sponges were characterised by higher relative abundances of Proteobacteria than cluster 1 sponges (with the exception of *Acanthella cavernosa*). Cluster 2 species

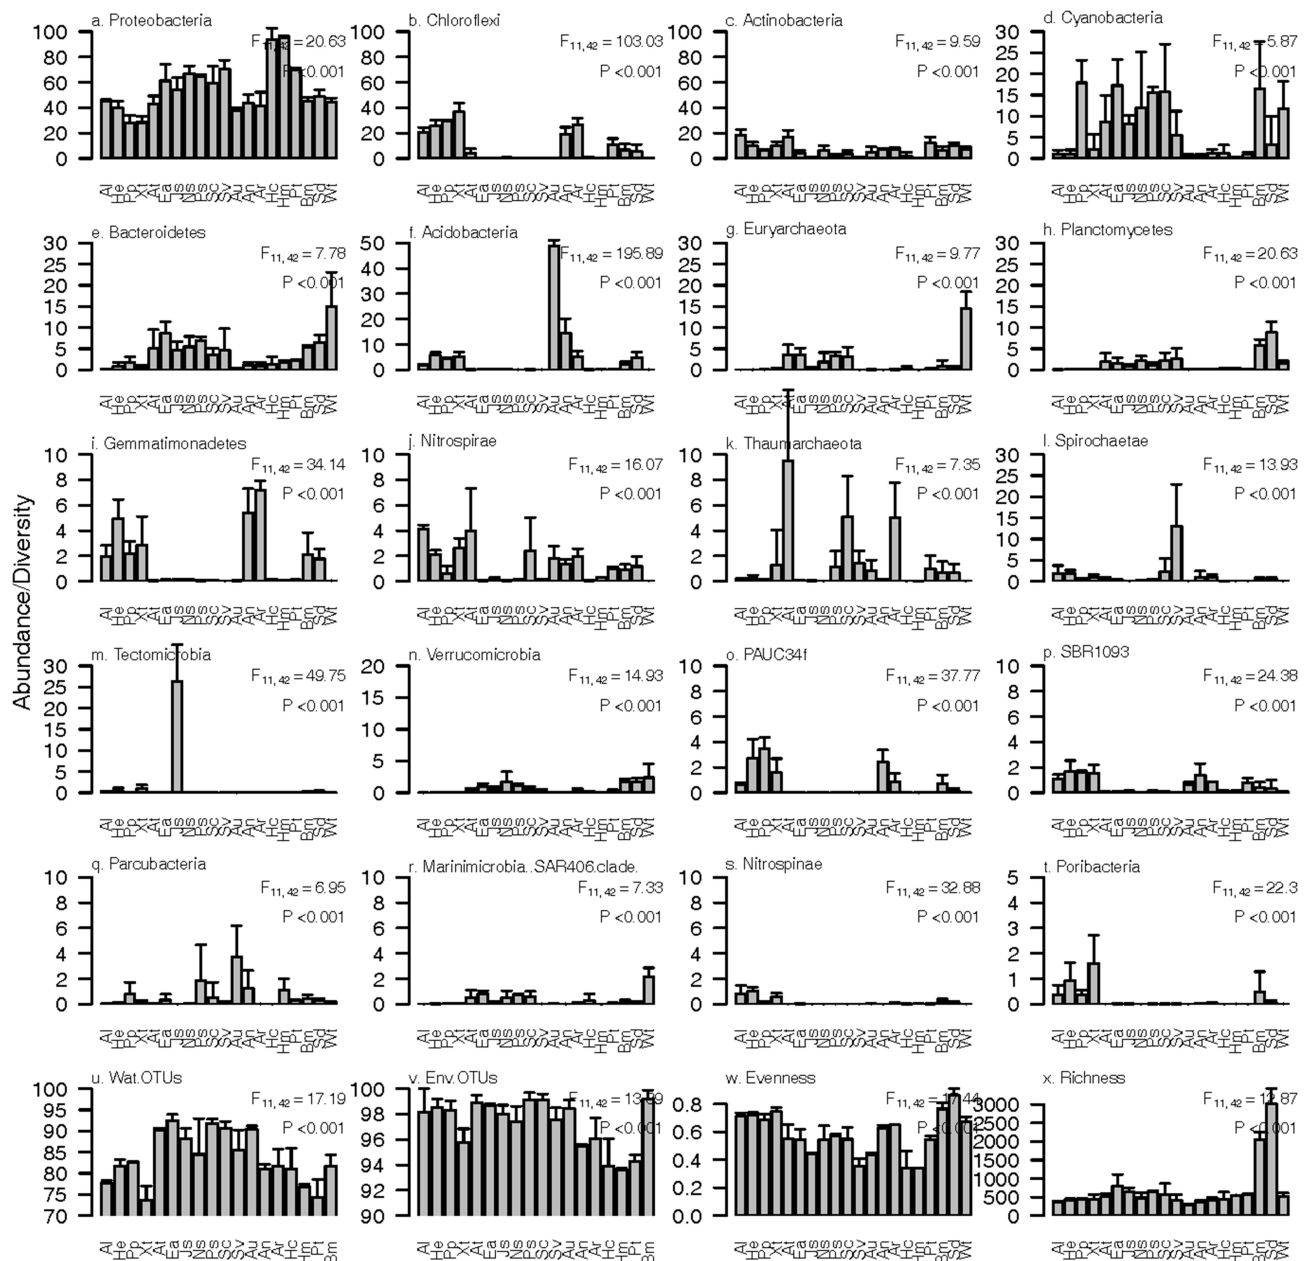

**Figure 6.** Mean (error bars represent a single standard deviation) relative abundance of (A) Proteobacteria, (B) Chloroflexi, (C) Actinobacteria, (D) Cyanobacteria, (E) Bacteroidetes, (F) Acidobacteria, (G) Euryarchaeota, (H) Planctomycetes, (I) Gemmatimonadetes, (J) Nitrospirae, (K) Thaumarchaeota, (L) Spirochaetae, (M) Tectomicrobia, (N) Verrucomicrobia, (O) PAUC34f, (P) SBR1093, (Q) Parcubacteria, (R) Marinimicrobia, (S) Nitrospirae, (T) Poribacteria, (U) seawater OTUs, (V) environmental OTUs (found in sediment and/or water), (W) evenness and (X) richness in the following biotopes: A. lobata (Al), H. erectus (He), P. purpurea (Pp), X. testudinaria (Xt), Ag. cavernosa (Au), A. nemoechinata (An), A. cornuta (Ar), A. cavernosa (At), E. asperum (Ea), J. splendens (Js), Neopetrosia sp. (Ns), P. spiculifer (Ps), S. carteri (Sc), H. cymaeformis (Hc), Hymeniacionid sp. (Hm), Paratetilla sp. (Pt), S. diversicolor (Sv), bacterial mat (Bm) sediment (Sd) and seawater (Wt). Results of the GLM analyses are presented in the top right of the subfigures.

also had significantly higher abundances of Bacteroidetes, Euryarchaeota (with the exception of *J. splendens*), Planctomycetes and Marinimicrobia (with the exception of *J. splendens*). Cluster 3 species generally differed from cluster 2 species with significantly lower abundances of Cyanobacteria, Euryarchaeota and Planctomycetes. Certain taxa were also particularly abundant in a given biotope. For example, the relative abundance of Acidobacteria was significantly higher in *Agelas cavernosa* than all other biotopes and the relative abundance of Tectomicrobia was significantly higher in *J. splendens* than all other biotopes

## DISCUSSION

Samples from sponge species separated into three clusters with one cluster containing samples of the species *A. lobata*, *H. erectus*, *P. purpurea* and *X. testudinaria* (cluster 1). The second cluster consisted of species which were compositionally more similar to seawater samples (cluster 2: *A. cavernosa*, *E. asperum*, *J. splendens*, *Neopetrosia* sp., *P. spiculifer*, *S. carteri* and *S. diversicolor*) and the third cluster consisted of species that were intermediate in composition to cluster 1 and 2 species (e.g. *Agelas caver-*

nosa, *A. nemoechinata*, *A. cornuta*) and included species that were compositionally more similar to sediment samples (*Hymeniacion* sp. and *H. cymaeformis*). Cluster 3, furthermore, included two strongly supported subclusters, one consisting of the agelasids *Agelas cavernosa*, *Agelas nemoechinata*, *Acahostylotella cornuta* and the other consisting of the remaining species *Hymeniacion* sp., *Paratetilla* sp. and *H. cymaeformis*.

Cluster support was strongest at the host species level. All sponge species, with the exceptions of *Acanthella cavernosa*, *Neopetrosia* sp. and *S. carteri* formed significantly supported clusters. This supports a number of previous studies highlighting the importance of host identity in structuring prokaryote communities (Cleary et al. 2015, 2018; Steinert et al. 2016; Moitinho-Silva et al. 2017; Souza et al. 2017). Moitinho-Silva et al. (2017), e.g., found that variation in the composition of the sponge microbiome was largely explained by host identity, followed by HMA-LMA status and geographical variation within species (Moitinho-Silva et al. 2017).

Notwithstanding the greater influence of seawater on the prokaryote communities of cluster 2 species, they were dominated by relatively few OTUs, some of which were similar to organisms previously found in other sponge species. These OTUs were also relatively rare in seawater. The number of these abundant, discriminating OTUs varied from just 1 in *E. asperum* to 2 in *P. spiculifer*, 3 in *J. splendens* and *Neopetrosia* sp. and 4 in *S. carteri* (Fig. 6). Like cluster 2 species, certain cluster 3 species were also dominated by small subsets of dominant OTUs. *Haliclona cymaeformis* and *Hymeniacion* sp., e.g. housed 3 dominant OTUs each while *Paratetilla* sp. and *S. diversicolor* housed one and two dominant OTUs, respectively. Other cluster 3 species (namely the agelasids) were more similar to cluster 1 species with respect to OTU dominance. Previous studies have also found that LMA sponges are characterised by the dominance of a limited set of OTUs in each sponge species, which are similar to sequences of organisms previously obtained from other LMA sponges (Giles et al. 2013; Poppell et al. 2014; Cleary et al. 2015, 2018, 2013). LMA sponges are also known to house prokaryote communities that are similar to those of seawater samples. For example, Moitinho-Silva et al. (2014) found that sequence data of *S. carteri* contained more sea water (~24%) sequences than *X. testudinaria* (~6%) in line with our results, although our higher percentage of seawater sequences in cluster 2 species (Fig. 3) was due to the removal of all OTUs <100 sequences. Taken together, our results suggest that cluster 2 species are LMA sponges and *S. carteri* and *S. diversicolor* have, in fact, previously been identified as LMA sponges (Gloeckner et al. 2014; Lurgi et al. 2019).

Cluster 1 species were compositionally distinct from cluster 2 and 3 species and differed significantly in the relative abundance of selected higher taxa. Cluster 1 species had significantly higher relative abundances of Chloroflexi (with the exceptions of *Agelas cavernosa* and *Paratetilla* sp.), Actinobacteria (with the exception of *Agelas cavernosa*), Acidobacteria (with the exception of *Agelas cavernosa*), Gemmatimonadetes, SBR1093, PAUC34f and Poribacteria than tested cluster 2 and 3 species.

Chloroflexi, Acidobacteria, Poribacteria and Actinobacteria are considered to be HMA indicators (Schmitt et al. 2011; Moitinho-Silva et al. 2017). Schmitt et al. (2011), e.g. showed that Chloroflexi were more abundant and diverse in HMA than LMA sponges and that HMA sponges contained similar Chloroflexi communities. In particular, Schmitt et al. (2011) found that the specific Chloroflexi lineages they found in HMA sponges were absent in other biotopes including seawater, algae, ascidians and LMA sponges. Although present in species from all clusters,

there was pronounced variation among species in each cluster including the abundance of selected OTUs. There were also differences in the abundance of actinobacterial OTUs between pairs of species from both clusters.

Another pronounced difference between cluster 1, 2 and 3 species was the significantly lower relative abundance of Poribacteria in species from the latter two clusters. Poribacteria have mainly been associated with marine sponges (Hentschel et al. 2012; Thomas et al. 2016), but are also present in other hosts (Cleary et al. 2019). Arellano et al. (2013) did not detect members of Poribacteria in the sponge species *Myxilla methanophila* collected at two different cold-seep locations (550 m depth) in the Gulf of Mexico. The authors proposed two justifications for the lack of members of this candidate phylum: lack of specificity of the primer pair used for this phylum or the fact that Poribacteria have only been detected in shallow water sponge species. In the present study, Poribacteria were recorded in all sponge species, but their relative abundance was very low in cluster 2 and 3 species. They were, however, relatively abundant in all cluster 1 species, which would seem to rule out the lack of primer specificity as a justification. Samples of all species in the present study were also collected at similar depths. Previous studies have reported on the absence (Hochmuth et al. 2010) or low abundance (Bayer, Kamke and Hentschel 2014; Moitinho-Silva et al. 2017) of Poribacteria in LMA as opposed to HMA species. Although based on a limited set of species, Bayer, Kamke and Hentschel (2014) reported 5 orders of magnitude more Poribacteria in their sampled HMA sponges (*Aplysina aerophoba*, *Chondrosia reniformis*, *Xestospongia muta*, *X. testudinaria* and *Ircinia felix*) than in their sampled LMA sponges (*Dysidea avara*, *S. carteri* and *Callyspongia vaginalis*). In the present study, the relative abundance of Poribacteria varied from  $0.36 \pm 0.19$  (*P. purpurea*) to  $1.61 \pm 1.11$  (*X. testudinaria*) for cluster 1 species and  $0.00 \pm 0.00$  (*Paratetilla* sp.) to  $0.06 \pm 0.01$  for cluster 2 and 3 species. Interestingly, Poribacteria were also recorded at relatively high mean abundances in bacterial mat samples although there was considerable variation among samples ( $0.49 \pm 0.79$ ).

Cluster 3 species were somewhat intermediate in composition to cluster 1 and 2 species. This included samples of the agelasids *Agelas cavernosa*, *A. cornuta* and *A. nemoechinata*. According to Gloeckner et al. (2014), in a study using transmission electron microscopy and DAPI-counting to determine the presence of microorganisms in the mesohyl matrix of several sponge species, the order Agelasida exclusively consisted of HMA species. However, as mentioned in the introduction, members of the genus *Agelas* only housed moderately dense microbial consortia in contrast to the high density consortia of other HMA sponge species (Gloeckner et al. 2014). In the present study, the agelasids in cluster 3 housed prokaryote communities distinct from species in clusters 1 and 2 and somewhat intermediate between both clusters as judged by the relative position of the sample points along axis 1 of Fig. 3. Although only three species belonging to different genera of agelasids were sampled in the present study, we provide some evidence that they deviate from other typical HMA species such as *X. testudinaria*.

The three agelasid species examined in the present study are also very different in colour and morphology. *Agelas nemoechinata* is a very common species and can be locally abundant in the southern Penghu islands. It is a large massive brown coloured sponge with several slightly raised oscules that can grow up to 1 m in height. The other *Agelas* species, *A. cavernosa*, is a very

small, common, cryptic, bright orange sponge that grows irregularly bearing digitiform outgrowths with a single, large oscule at the tips. The other agelasid sponge species examined was *A. cornuta*. This species was previously placed in a different order, Poecilosclerida, but DNA barcoding revealed that this species is a true agelasid sponge species (Morrow and Cardenas 2015). *Acanthostylotella cornuta* is a rare, but locally abundant, light green to brown sponge species, and grows thinly encrusting under coral overhangs.

In addition to the agelasids, the species *Hymeniacion* sp., *Paratetilla* sp. and *H. cymaeformis* also were intermediate in composition along axis 1 between cluster 1 and 2 species. These species are distinct from each other. The *Paratetilla* species is probably a new sponge species and is a very common sponge in the Penghu Islands, but has not been observed outside Taiwan. It is globular and the exterior is white but the interior can be brown to purple in colour. It often grows on a sandy bottom and is covered by a thin layer of sediment. *Haliclona cymaeformis* is a bright green branching species and lives in association with a red macroalgae *Ceratodictyon spongiosum*. The sponge and algal species only occur in symbiosis and both species have never been observed without the other. The association is widespread and the species occurs from the Madagascar Sea to New Caledonia (van Soest et al. 2019) and mainly in very shallow water. The *Hymeniacion* sponge species was not identified to species level, and is also probably a new species. This species, yellow in colour, was only found at one location growing thickly encrusting and exposed, out of the water, in the intertidal area. *Paratetilla* species and *Hymeniacion* sp. were both found in shallow, turbid, silty environments.

Taken together, our data support the LMA status of the cluster 2 species *Acanthella cavernosa*, *E. asperum*, *J. splendens* and *P. spiculifer*, in addition to the previously identified LMA species *S. carteri* and *S. diversicolor*. Our results also support the HMA status of the cluster 1 species *A. lobata* and *P. purpurea*, in addition to the previously identified HMA species *H. erectus* and *X. testudinaria* (Gloeckner et al. 2014; Lurgi et al. 2019). The cluster 3 species, which consisted of the agelasids *Agelas cavernosa*, *A. nemoechinata* and *A. cornuta* in addition to *Hymeniacion* sp., *Paratetilla* sp. and *H. cymaeformis* were compositionally distinct.

Moitinho-Silva et al. (2017) previously showed that there was more variation in the microbial composition of LMA as opposed to HMA species in line with the results of our study. In the present study, all sponge species formed strongly supported clusters with the exceptions of *Acanthella cavernosa*, *Neopetrosia* sp. and *S. carteri*. We also found evidence of geographical structuring in the HMA species *X. testudinaria* and *H. erectus*. Swierds, Cleary and de Voogd (2018) also identified significant geographical structuring of prokaryote communities associated with *X. testudinaria* across the Indopacific. Our results suggest that this may also apply to *H. erectus*.

The composition of the bacterial mats in the present study was highly variable although Cyanobacteria were the most abundant element. The bacterial mats also housed relatively high abundances of actinobacterial and Chloroflexi OTUs found in cluster 1 sponge species and a relatively high abundance of Poribacteria compared to cluster 2 and 3 species as mentioned previously. The dominant cyanobacterial OTUs in the mats were assigned to the genera *Synechococcus* and *Trichodesmium*. In Schiermonnikoog, the Netherlands, Cardoso et al. (2017) identified Cyanobacteria and Proteobacteria as the major taxa in coastal microbial mats followed by Bacteroidetes and Chloroflexi. They also identified an OTU assigned to the

genus *Trichodesmium* as among the most active component of their dataset. *Trichodesmium* spp., however, are planktonic gas-vacuolated cyanobacteria and they suggested the organism in their dataset may be a close relative of *Trichodesmium* that has adapted to a benthic life style.

## CONCLUSION

The present study used 16S rRNA gene sequence data to test to what extent sponges could be given HMA or LMA status in line with previous studies (Hentschel et al. 2002, 2003; Cleary et al. 2015, 2018; de Voogd et al. 2015, 2018; Polónia et al. 2015b; Moitinho-Silva et al. 2017). Our results indicate LMA status for the species *Acanthella cavernosa*, *E. asperum*, *J. splendens*, *P. spiculifer*, *S. carteri* and *S. diversicolor*, and HMA status for the species *A. lobata*, *H. erectus*, *P. purpurea* and *X. testudinaria*. A number of species, however, did not appear to fit neatly within the HMA/LMA dichotomy and contained prokaryote communities intermediate between HMA and LMA species, some of which were compositionally closer to sediment samples. Our study also revealed high richness in bacterial mat communities and certain similarities between bacterial mat and sponge samples. Future studies would, thus, benefit from a more in-depth study of coral reef bacterial mats.

## SUPPLEMENTARY DATA

Supplementary data are available at FEMSEC online.

## FUNDING

This work is a contribution to the projects LESS CORAL [PTDC/AAC-AMB/115304/2009] and Ecotech-Sponge (PTDC/BIAMIC/6473/2014-POCI-01-0145-FEDER-016531). Thanks are due for the financial support to CESAM (UID/AMB/50017/2019), to the Portuguese Foundation for Science and Technology FCT/MCTES through national funds, and co-funding by FEDER [FCOMP-01-0124-FEDER-008657], within the PT2020 Partnership Agreement and Compete 2020. Financial support was given by the Ministry of Science and Technology (MOST), Taiwan under grant NSC 102-2815-C-346-010-B and the Asia-Pacific Ocean Research Center, National Sun Yat-sen University, supported by the Ministry of Education, Taiwan. Ana Polónia was supported by a scholarship (SFRH/BPD/117563/2016) funded by FCT, Portugal, within the Human Capital Operational Programme (HCOP), subsidised by the European Social Fund (ESF) and national funds MCTES.

## ACKNOWLEDGEMENTS

We are grateful for the support in the field by Julian Cleary, Floris Cleary and Kate Liao.

**Conflict of interest.** None declared.

## REFERENCES

- Arellano SM, Lee O, Lafi FF et al. Deep Sequencing of *Myxilla* (*Ectomyxilla*) *methanophila*, an epibiotic sponge on cold-seep tubeworms, reveals methylotrophic, thiotrophic, and putative hydrocarbon-degrading microbial associations. *Microb Ecol* 2013;65:450–61.
- Bayer K, Kamke J, Hentschel U. Quantification of bacterial and archaeal symbionts in high and low microbial abundance

- sponges using real-time PCR. *FEMS Microbiol Ecol* 2014;**89**:679–90.
- Bell J. The functional roles of marine sponges. *Estuar Coast Shelf Sci* 2008;**79**:341–53.
- Bell JJ, Davy SK, Jones T et al. Could some coral reefs become sponge reefs as our climate changes? *Glob Change Biol* 2013;**19**:2613–24.
- Borcard D, Gillet F, Legendre P. *Numerical Ecology with R*. Springer Nature Switzerland: Springer International Publishing, 2018, 435.
- Caporaso JG, Kuczynski J, Stombaugh J et al. QIIME allows analysis of high-throughput community sequencing data. *Nat Methods* 2010;**7**:335–6.
- Cleary DFR, Becking LE, Voogd NJD et al. Habitat- and host-related variation in sponge bacterial symbiont communities in Indonesian waters. *FEMS Microbiol Ecol* 2013;**85**:465–82.
- Cleary DFR, de Voogd NJ, Polónia ARM et al. Composition and predictive functional analysis of bacterial communities in seawater, sediment and sponges in an Indonesian coral reef environment. *Microb Ecol* 2015;**70**:889–903.
- Cleary DFR, Polónia ARM, Becking LE et al. Compositional analysis of bacterial communities in seawater, sediment and high and low microbial abundance sponges in the Misool coral reef system, Indonesia. *Mar Biodivers* 2018;**48**:1889–901.
- Cleary DFR, Polónia ARM, Renema W et al. Coral reefs next to a major conurbation: a study of temporal change (1985–2011) in coral cover and composition in the reefs of Jakarta, Indonesia. *Mar Ecol Prog Ser* 2014;**501**:89–98.
- Cleary DFR, Polónia ARM, Renema W et al. Variation in the composition of corals, fishes, sponges, echinoderms, ascidians, molluscs, foraminifera and macroalgae across a pronounced in-to-offshore environmental gradient in the Jakarta Bay-Thousand Islands coral reef complex. *Mar Pollut Bull* 2016;**110**:701–17.
- Cleary DFR, Swierts T, Coelho FJRC et al. The sponge microbiome within the greater coral reef microbial metacommunity. *Nat Commun* 2019;**10**:1644.
- Cleary DFR. Linking fish species traits to environmental conditions in the Jakarta Bay Pulau Seribu coral reef system. *Mar Pollut Bull* 2017;**122**:259–62.
- Coelho FJRC, Cleary DFR, Gomes NCM et al. Sponge prokaryote communities in Taiwanese coral reef and shallow hydrothermal vent ecosystems. *Microbial Ecology* 2018;**75**:239–54. DOI: 10.1007/s00248-017-1023-x
- de Bakker DM, van Duyl FC, Bak RPM et al. 40 Years of benthic community change on the Caribbean reefs of Curaçao and Bonaire: the rise of slimy cyanobacterial mats. *Coral Reefs* 2017;**36**:355–67.
- de Voogd NJ, Cleary DFR, Polónia ARM et al. Bacterial communities of four different biotopes and their functional genomic nitrogen signature from the thousand-island reef complex, West-Java, Indonesia. *FEMS Microbiol Ecol* 2015;**91**:fiv019.
- de Voogd NJ, Gauvin-Bialecki A, Polónia ARM et al. Assessing the bacterial communities of sponges inhabiting the remote western Indian Ocean island of Mayotte. *Mar Ecol* 2018;**39**:e12517.
- Edgar R, Haas B, Clemente J et al. UCHIME improves sensitivity and speed of chimera detection. *Bioinformatics* 2011;**27**:2194–200.
- Edgar RC. UPARSE: highly accurate OTU sequences from microbial amplicon reads. *Nat Methods* 2013;**10**:996–8.
- Fan L, Reynolds D, Liu M et al. Functional equivalence and evolutionary convergence in complex communities of microbial sponge symbionts. *Proc Natl Acad Sci USA* 2012;**109**:E1878–87.
- Gardner TA, Côté IM, Gill JA et al. Long-term region-wide declines in Caribbean corals. *Science* 2003;**301**:958–60.
- Giles EC, Kamke J, Moitinho-Silva L et al. Bacterial community profiles in low microbial abundance sponges. *FEMS Microbiol Ecol* 2013;**83**:232–41.
- Gloeckner V, Wehr M, Moitinho-Silva L et al. The HMA-LMA dichotomy revisited: an electron microscopical survey of 56 sponge species. *Biol Bull* 2014;**227**:78–88.
- Hentschel U, Fieseler L, Wehr M et al. Microbial diversity of marine sponges. *Prog Mol Subcell Biol* 2003;**37**:59–88.
- Hentschel U, Hopke J, Horn M et al. Molecular evidence for a uniform microbial community in sponges from different oceans. *Appl Environ Microbiol* 2002;**68**:4431–40.
- Hentschel U, Piel J, Degnan SM et al. Genomic insights into the marine sponge microbiome. *Nat Rev Microbiol* 2012;**10**:641–54.
- Hentschel U, Usher KM, Taylor MW. Marine sponges as microbial fermenters. *FEMS Microbiol Ecol* 2006;**55**:167–77.
- Hochmuth T, Niederkrüger H, Gernert C et al. Linking chemical and microbial diversity in marine sponges: possible role for poribacteria as producers of methyl-branched fatty acids. *Chembiochem* 2010;**11**:2572–8.
- Huang YM, de Voogd NJ, Cleary DFR et al. Biodiversity pattern of subtidal sponges (Porifera: Demospongiae) in the Penghu Archipelago (Pescadores), Taiwan. *J Mar Biol Assoc UK* 2016;**96**:417–27.
- Hughes TP, Baird AH, Bellwood DR et al. Climate change, human impacts, and the resilience of coral reefs. *Science* 2003;**301**:929–33.
- Klindworth A, Pruesse E, Schweer T et al. Evaluation of general 16S ribosomal RNA gene PCR primers for classical and next-generation sequencing-based diversity studies. *Nucleic Acids Res* 2013;**41**:e1.
- Legendre P, Gallagher ED. Ecologically meaningful transformations for ordination of species data. *Oecologia* 2001;**129**:271–80.
- Lenth R. *emmeans: Estimated Marginal Means, aka Least-Squares Means*. <https://CRAN.R-project.org/package=emmeans> (2017, date last accessed).
- Loh TL, McMurray SE, Henkel TP et al. Indirect effects of overfishing on Caribbean reefs: sponges overgrow reef-building corals. *PeerJ* 2015;**3**:e901.
- Lurgi M, Thomas T, Wemheuer B et al. Modularity and predicted functions of the global sponge-microbiome network. *Nat Commun* 2019;**10**:992.
- Maldonado M, Aguilar R, Bannister RJ et al. Sponge grounds as key marine habitats: a synthetic review of types, structure, functional roles, and conservation concerns. In: *Marine Animal Forests*. Berlin: Springer, 2016, DOI: 10.1007/978-3-319-17001-5\_24-1.
- McMurray SE, Finelli CM, Pawlik JR. Population dynamics of giant barrel sponges on Florida coral reefs. *J Exp Mar Bio Ecol* 2015;**473**:73–80.
- Mitra A, Skrzypczak M, Ginalska K et al. Strategies for achieving high sequencing accuracy for low diversity samples and avoiding sample bleeding using illumina platform. *PLoS One* 2015;**10**:e0120520.
- Moitinho-Silva L, Bayer K, Cannistraci CV et al. Specificity and transcriptional activity of microbiota associated with low and high microbial abundance sponges from the Red Sea. *Mol Ecol* 2014;**23**:1348–63.
- Moitinho-Silva L, Steinert G, Nielsen S et al. Predicting the HMA-LMA status in marine sponges by machine learning. *Front Microbiol* 2017;**8**:752.

- Morrow C, Cárdenas P. Proposal for a revised classification of the Demospongiae (Porifera). *Front Zool* 2015;**12**:7.
- Oksanen J, Guillaume Blanchet F, Friendly M et al. *vegan: Community Ecology Package*. R package version 2.5–6, 2019. DOI: <https://CRAN.R-project.org/package=vegan>
- Polónia ARM, Cleary DFR, de Voogd NJ et al. Habitat and water quality variables as predictors of community composition in an Indonesian coral reef: a multi-taxon study in the Spermonde Archipelago. *Sci Total Environ* 2015b;**537**:139–51. DOI: 10.1016/j.scitotenv.2015.07.102
- Polónia ARM, Cleary DFR, Freitas R et al. The putative functional ecology and distribution of archaeal communities in an Indonesian coral reef environment. *Mol Ecol* 2015a;**24**:409–23.
- Poppell E, Weisz J, Spicer L et al. Sponge heterotrophic capacity and bacterial community structure in high- and low-microbial abundance sponges. *Mar Ecol* 2014;**35**: 414–24.
- Quast C, Pruesse E, Yilmaz P et al. The SILVA ribosomal RNA gene database project: improved data processing and web-based tools. *Nucl Acids Res* 2013;**41**:D590–6.
- Rao CR. A review of canonical coordinates and an alternative to correspondence analysis using Hellinger distance. *Qüestii* 1995;**19**:23–63.
- R Core Team. *R: A Language and Environment for Statistical Computing*. Version 3-900051-07-0. Vienna, Austria: R Foundation for Statistical Computing, 2013. DOI: <http://www.R-project.org>.
- Reiswig HM. Partial carbon and energy budgets of the bacteriosponge *Verohgia fistularis* (Porifera: Demospongiae) in Barbados. *Mar Ecol* 1981;**2**:273–93.
- Schmitt S, Deines P, Behnam F et al. Chloroflexi bacteria are more diverse, abundant, and similar in high than in low microbial abundance sponges. *FEMS Microbiol Ecol* 2011;**78**: 497–510.
- Sinha R. Index switching causes “Spreading-Of-Signal” among multiplexed samples in illumina HiSeq 4000 DNA sequencing. *BioRxiv* 125724. <https://www.biorxiv.org/content/10.1101/125724v1>(2017, date last accessed).
- Souza DT, Genuário DB, Silva FSP et al. Analysis of bacterial composition in marine sponges reveals the influence of host phylogeny and environment. *FEMS Microbiol Ecol* 2017;**93**:fw204.
- Steinert G, Taylor MW, Deines P et al. Schupp PJ In four shallow and mesophotic tropical reef sponges from Guam the microbial community largely depends on host identity. *PeerJ* 2016;**4**:e1936.
- Suzuki R, Shimodaira H pvclust: hierarchical clustering with P-values via multiscale bootstrap. R package version 2.0-0. <https://CRAN.R-project.org/package=pvclust>(2015, date last accessed).
- Swierts T, Cleary DFR, de Voogd NJ. Biogeography of prokaryote communities in closely related giant barrel sponges across the Indo-Pacific. *FEMS Microbiol Ecol* 2018;**94**:fy194.
- Taylor MW, Radax R, Steger D et al. Sponge-associated microorganisms: evolution, ecology, and biotechnological potential. *Microbiol Mol Biol Rev* 2007;**71**:295–347.
- Thomas T, Moitinho-Silva L, Lurgi M et al. Diversity, structure and convergent evolution of the global sponge microbiome. *Nat Commun* 2016;**7**:11870.
- Tweedie MCK. An index which distinguishes between some important exponential families. In: Ghosh JK, Roy J (eds). *Statistics: Applications and New Directions*. Calcutta: Indian Statistical Institute, 1984, 579–604.
- Vacelet J, Donadey C. Electron microscope study of the association between some sponges and bacteria. *J Exp Mar Biol Ecol* 1977;**30**:301–14.
- Van Soest RWM, Boury-Esnault N, Hooper JNA et al. *World Porifera Database*. 2019.DOI: 10.14284/359. <http://www.marinespecies.org/poriferaon2019-06-30>.
- Ward JH. Hierarchical grouping to optimize an objective function. *J Am Stat Assoc* 1963;**58**:236–44.
- Wulff J. Assessing and monitoring coral reef sponges: why and how? *Bull Mar Sci* 2001;**69**:831–46.
- Zhang Z, Schwartz S, Wagner L et al. A greedy algorithm for aligning DNA sequences. *J Comput Biol* 2000;**7**:203–14.
